# Supplementary material for: Linking mixing processes and climate variability to the heat content distribution of the Eastern Mediterranean abyss
Source: PubMed Central journal article supplement (PMC6063911; doi:10.1038/s41598-018-29343-4), 2018-07-27
Supplement: 41598_2018_29343_MOESM1_ESM.pdf [file 41598_2018_29343_MOESM1_ESM.pdf]

## Supplementary Information

*for*

### **Linking mixing processes and climate variability to the heat content distribution of the Eastern Mediterranean abyss**

Vincenzo Artale<sup>1,2</sup>, Federico Falcini<sup>2\*</sup>, Salvatore Marullo<sup>1,2</sup>, Manuel Bensi<sup>3</sup>, Florian Kokoszka<sup>4</sup>,  
Daniele Iudicone<sup>4</sup>, Angelo Rubino<sup>5</sup>

<sup>1</sup> *Agenzia Nazionale per le Nuove Tecnologie, l'Energia e lo Sviluppo Economico Sostenibile, ENEA — Centro Ricerche Frascati - Department for Sustainability (SSPT), Frascati 00044, Italy*

<sup>2</sup> *Istituto di Scienze dell'Atmosfera e del Clima, Consiglio Nazionale delle Ricerche, Roma 00133, Italy*

<sup>3</sup> *Istituto Nazionale di Oceanografia e di Geofisica Sperimentale, OGS, Trieste, 34010, Italy*

<sup>4</sup> *Stazione Zoologica Anton Dohrn, Villa Comunale, Napoli, 80121, Italy*

<sup>5</sup> *Department of Environmental Sciences, Informatics and Statistics, University of Venice, Mestre 30172, Italy*

\*Corresponding Author. E-mail: ffalcini@isac.cnr.it

**Abstract.** We provide here supplementary materials such as methodologies, complementary data, and theoretical and experimental analysis. In particular, we provides general information about hydrologic features of the Ionian abyssal layer and the evolution of the Adriatic outflow characteristics.

#### **Hydrographic conditions in the 2011**

In situ measurements (Fig. S1) revealed a large inter-annual, thermohaline variability from 2003 to 2010 of the Adriatic outflow [1]. In 2003, the Adriatic Deep Water (AdDW) was not dense (i.e., cold) enough to reach the Ionian abyssal plain [2,3]. Then, it became colder until 2009, resulting in a large (negative) temperature difference,  $\Delta T \sim -0.3^\circ\text{C}$ ; then it warmed again starting from 2010.

29 Salinity, on the other hand, increased until 2007 and then reversed with a difference of about  $\Delta S \sim$   
30 0.04 [1].

31 Temperature ( $T$ ), salinity ( $S$ ), and Dissolved Oxygen ( $DO$ ) measurements carried out in the  
32 Ionian Sea during November 2011 (Fig. 3) show the presence of two Eastern Mediterranean Deep  
33 Water (EMDW) cores ( $T = 13.41\text{-}13.42$  °C;  $S = 38.72\text{-}38.73$ ). The first, located around 3000 m depth,  
34 is the “old EMDW” ( $DO = 4.3$  ml/l); the second is “new EMDW” ( $DO = 4.4$  ml/l) and it is observed  
35 in all stations that are below 3000 m depth (Fig. 3). This agrees with what observed in October 2009  
36 and July 2010 over the same region [1]: the amount of Adriatic water (i.e., the strength of its mixing  
37 layer) that was produced during 2009-2010 did not cause an actual change of the thermoaline structure  
38 while differences in  $DO$  records, however, the continue advection of Adriatic water. Therefore,  
39 bottom waters in the Ionian Sea, observed in 2011, must be the result of the convolution of the non-  
40 stationary advection of the Adriatic mixing layer formed before 2007 [4], whose diffusion should act  
41 on a temporal scale between 3 and 7 years [5]. This proves that the stratification of the abyssal part  
42 of the Ionian Sea reflects the buoyancy flux variability from the Adriatic rather than local, external  
43 heat forcing that does not actually contribute to the bottom layer hydrography. Indeed, down-welling  
44 due to buoyancy loss depends not only on the amount heat sources acting at the sea surface (e.g., the  
45 wind stress) but also on mixed layer depth, stratification, and horizontal velocities [6]. Numerical  
46 simulations support this interpretation [7,8]: cold events (similar to the EMT) that produce large  
47 decadal variability of the deep water formation and show a hysteresis behavior, by activating the  
48 intrinsic nonlinearity of the Adriatic-Ionian-Aegean system. This results from the buoyancy transport  
49 at the source-water site of the Eastern Mediterranean [8] and agrees with what is generally found for  
50 the conveyor belt circulation of the Atlantic Ocean [9]. In addition, it is relevant to note the evolution  
51 of  $T$ - $S$  diagrams (Fig. S3), which show two “elbows”, not usually observed in the Mediterranean  
52 bottom layers in 2008 and 2011. The geometrical difference between the two “elbow” means more  
53 likely the transition from a thermocline to a halocline, and finally from the end of the halocline to the  
54 topographic bottom shows the evidence of a very deep mixed layer.

55

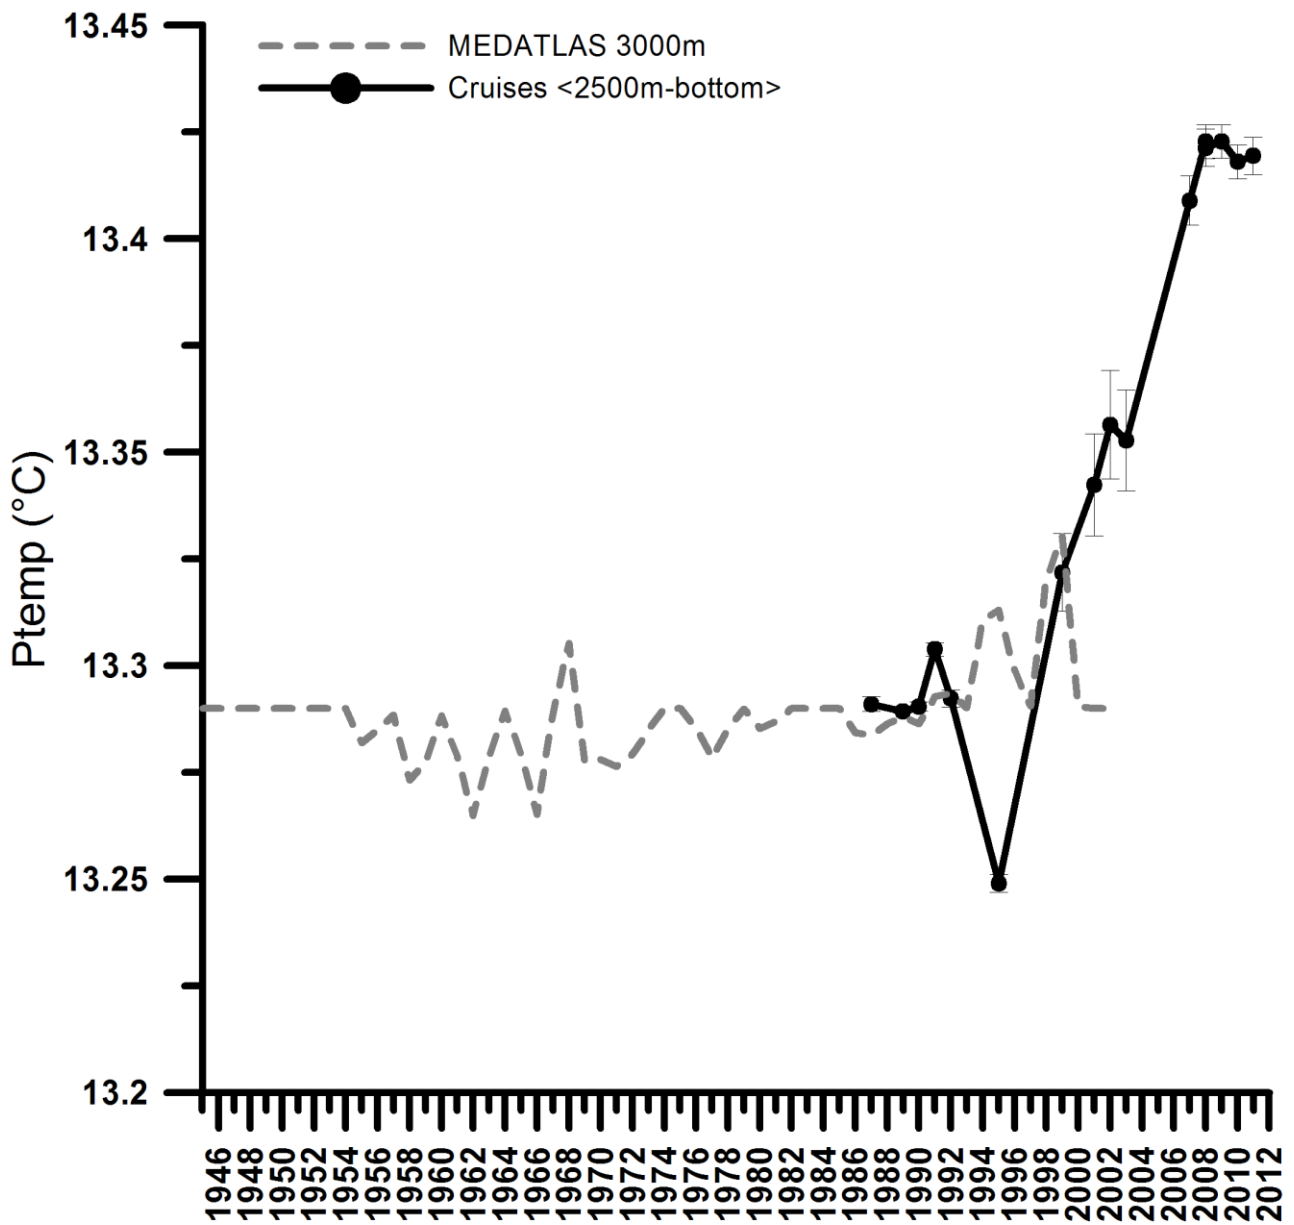

56

57 **Figure S1. Time series of potential temperature (°C) in the central abyssal Ionian region.** Grey  
 58 dashed line refers to the reconstructed climatology (1945-2002) of ocean temperature, salinity, and  
 59 density (MEDAR/MEDATLAS-II: Fichaut et al., 2003; Rixen et al., 2005). Black line/dots refer to  
 60 *in-situ* data gathered through several oceanographic cruises: vertical CTD profiles are averaged in the  
 61 layer 2500m-bottom (vertical bars show the standard deviation).

62

63

64

65

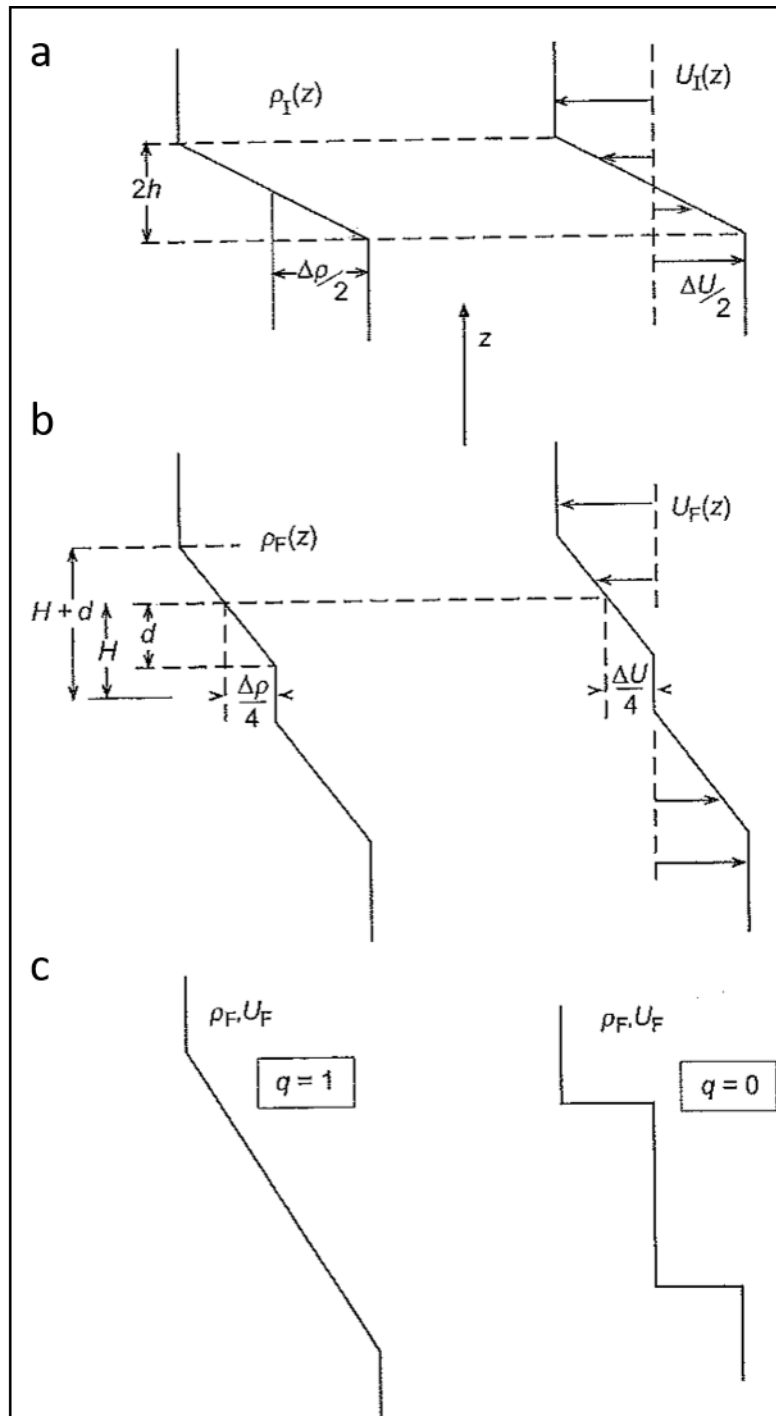

66

67 **Figure S2. Mixing and step-like features.** Sketch of the initial and final velocity and density before  
 68 and after Kelvin-Helmholtz instability. From “The turbulent ocean” by S.A. Thorpe, 2007 (Figure  
 69 3.16, p. 107). Copyright 2005 by Cambridge University Press. Reprinted with permission. This figure  
 70 cannot be reproduced, shared, altered, or exploited commercially in any way without the permission  
 71 of Cambridge University Press, as it is copyrighted material and therefore not subject to the  
 72 allowances permitted by a CC licence.

73

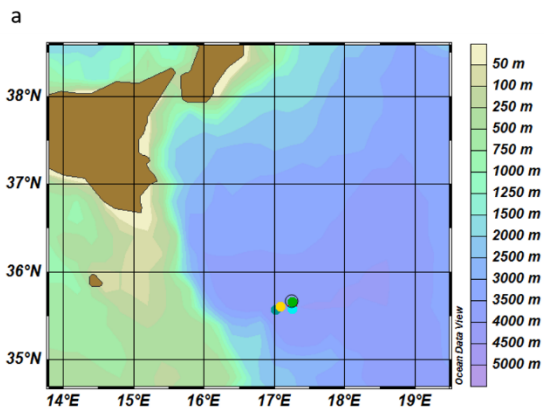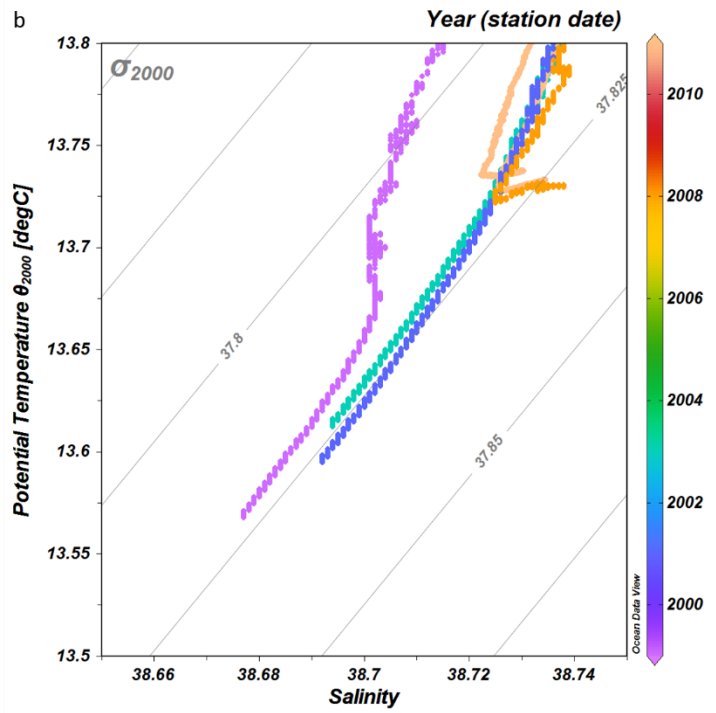

74

75 **Figure S3. Mixing and “elbows” features.** (a) geographic location of the deepest stations in the  
 76 Ionian Sea. (b) T-S diagrams of the stations in panel (a), from 1999 to 2011. Figure created using  
 77 Ocean Data View software (ODV - version, 4.7.4., Schlitzer, R., Ocean Data View, odv.awi.de,  
 78 2017).

79

80

81

82

83

84

85

86

87

88

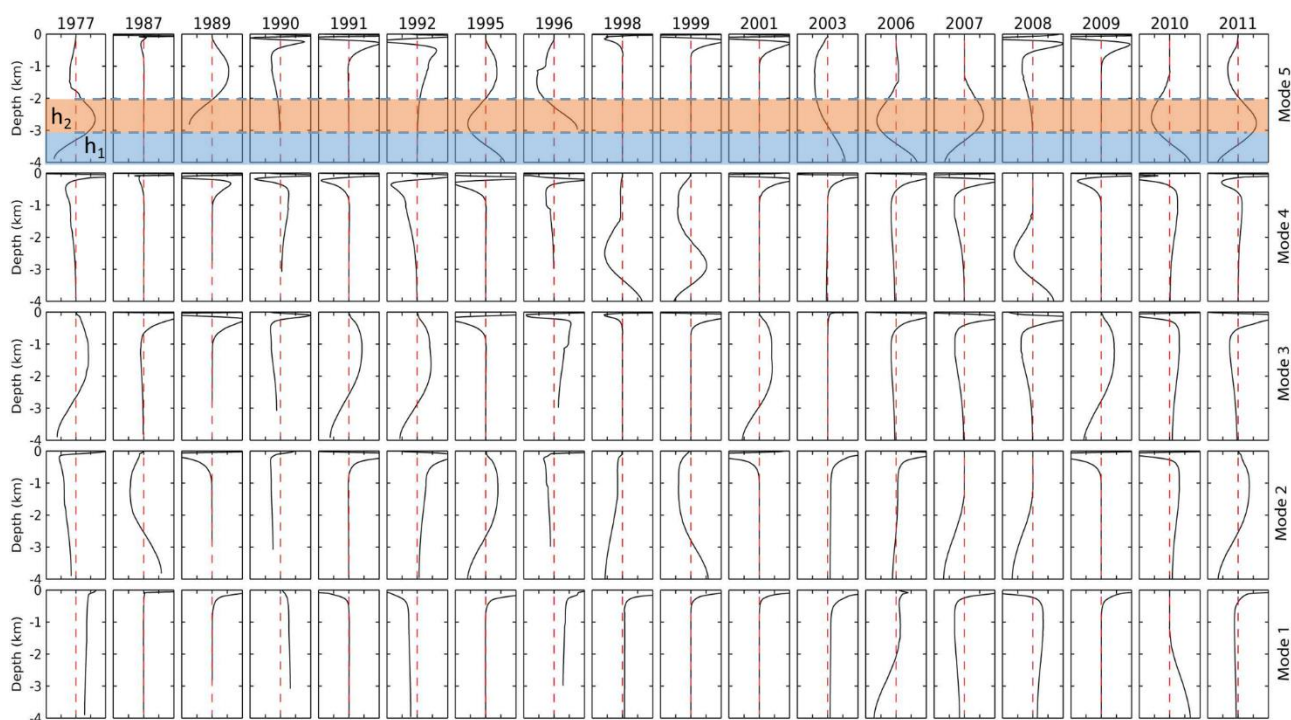

89

90 **Figure S4. Vertical baroclinic modes.** Temporal evolution of the vertical modes, from 1977 (left)  
 91 to 2011 (right). For the 5<sup>th</sup> mode, we indicate the two baroclinic structures characterized by the  
 92 equivalent depths (i.e., zero-crossing)  $h_1$  and  $h_2$ , that were observed in 1977 and in 2011.

93

94

95

## References

96

1. Bensi, M., Rubino, A., Cardin, V., Hainbucher, D. & Mancero-Mosquera, I. Structure and  
 97 variability of the abyssal water masses in the Ionian Sea in the period 2003-2010. *J.*  
 98 *Geophys. Res. Oceans* **118**, 931-943 (2013).

99

2. Hainbucher, D., Rubino, A. & Klein, B. Water mass characteristics in the deep layers of the  
 100 western Ionian Basin observed during May 2003. *Geophys. Res. Lett.* **33**, (2006).

101

3. Rubino, A. & Hainbucher, D. A large abrupt change in the abyssal water masses of the  
 102 eastern Mediterranean. *Geophys. Res. Lett.* **34** (2007).

103

4. Hainbucher, D., Rubino, A., Cardin, V., Tanhua, T., Schroeder, K. & Bensi, M.  
 104 Hydrographic situation during cruise M84/3 and P414 (spring 2011) in the Mediterranean  
 105 Sea. *Ocean Science*, **10**, 669 (2014).

106

5. Jungclauss, J. H. & Backhaus, J. O. Application of a transient reduced gravity plume model  
 107 to the Denmark Strait Overflow. *J. Geophys. Res. Oceans* **99**, 12375-12396 (1994).

108

6. Spall, M. A. Buoyancy-forced downwelling in boundary currents. *J. Phys. Oceanogr.* **38**,  
 109 2704-2721 (2008).

- 110 7. Winton, M. & Sarachik, E. S. Thermohaline oscillations induced by strong steady salinity  
111 forcing of ocean general circulation models. *J. Phys. Oceanogr.* **23**, 1389-1410 (1993).
- 112 8. Amitai, Y., Ashkenazy, Y. & Gildor, H. Multiple equilibria and overturning variability of  
113 the Aegean-Adriatic Seas. *Glob. Planet. Change* **151**, 49-59 (2016).
- 114 9. Rahmstorf, S. On the freshwater forcing and transport of the Atlantic thermohaline  
115 circulation. *Clim. Dyn.* **12**, 799-811 (1996).
- 116 10. Fichaut, M., Garcia, M. J., Giorgetti, A., Iona, A., Kuznetsov, A., Rixen, M. & Group, M.  
117 MEDAR/MEDATLAS 2002: A Mediterranean and Black Sea database for operational  
118 oceanography. Elsevier Oceanography Series **69**, 645-648 (2003).
- 119 11. Rixen, M., Beckers, J. M., Levitus, S., Antonov, J., Boyer, T., Maillard, C., ... & Garcia, M.  
120 J. The Western Mediterranean Deep Water: a proxy for climate change. *Geophys. Res. Lett.*  
121 **32** (2005).
- 122 12. Thorpe, S. A. (2005). *The turbulent ocean*. Cambridge University Press.
